# Supplementary material for: Synthesis of organic–inorganic hybrid microcapsules through in situ generation of an inorganic layer on an adhesive layer with mineralization-inducing capability
Source: Royal Society of Chemistry journal article supplement (doi:10.1039/c4tb01802h), 2014-11-19
Supplement: c4tb01802h1.pdf [file c4tb01802h1.pdf]

## Supporting information

### **Synthesis of organic-inorganic hybrid microcapsules through *in situ* generating an inorganic layer on an adhesive layer with mineralization-inducing capability**

*Jiafu Shi<sup>‡, §</sup> Wenyan Zhang<sup>‡</sup>, Shaohua Zhang<sup>‡</sup>, Xiaoli Wang<sup>‡</sup>, Zhongyi Jiang<sup>‡, §, \*</sup>*

<sup>‡</sup> Key Laboratory for Green Chemical Technology of Ministry of Education, School of Chemical Engineering and Technology, Tianjin University, Tianjin 300072, China.

<sup>†</sup> School of Environmental Science and Engineering, Tianjin University, Tianjin 300072, China

<sup>§</sup> Collaborative Innovation Center of Chemical Science and Engineering (Tianjin), Tianjin 300072, China

\* To whom correspondence should be addressed. E-mail: zhyjiang@tju.edu.cn; Fax: 86-22-23500086; Tel: 86-22-27406646 (Zhongyi Jiang)

***Supplemental experimental details about the thermal denaturation kinetic (according to previous literatures)<sup>[R1-R3]</sup>***

The thermal denaturation constants ( $k_d$ ,  $h^{-1}$ ) were calculated according to Equation. (1):

$$A_{cat} / A_{cat,0} = \exp(-k_d t) \quad (1)$$

The half-life ( $t_{1/2}$ ,  $h$ ) value was calculated according to Equation (2):

$$t_{1/2} = \ln 2 / k_d \quad (2)$$

The activation energy ( $E_d$ ,  $kJ$ ) was calculated according to the Equation (3):

$$\ln k_d = -E_d / RT + \ln C \quad (3)$$

The  $E_d$  was determined by the Equation (4):

$$\text{Slope} = -E_d / R \quad (4)$$

The change in enthalpy ( $\Delta H^0$ ,  $kJ \text{ mol}^{-1}$ ) was determined by the Equation (5)<sup>[R3]</sup>:

$$\Delta H^0 = E_d - RT \quad (5)$$

where  $A_{cat}$  was the CAT activity after incubation for a specific time at a specific temperature,  $A_{cat,0}$  was the CAT activity before incubation,  $t$  was the incubation time (h),  $R$  was the gas constant ( $8.3145 \text{ J mol}^{-1} \text{ K}^{-1}$ ) and  $T$  was the corresponding absolute temperature (K).

***References:***

- [R1] Hong Wu, Yanpeng Liang, Jiafu Shi, Xiaoli Wang, Dong Yang, Zhongyi Jiang, Enhanced stability of catalase covalently immobilized on functionalized titania submicrospheres, *Materials Science and Engineering: C*, 2013, 33, 1438-1445.
- [R2] Domink L. Jurgen-Lohmann, Raymond L. Legge, Immobilization of bovine catalase in sol-gels, *Enzyme and Microbial Technology*, 2006, 39, 626-633.
- [R3] Ajay Pal, Farhath Khanum, Covalent immobilization of xylanase on glutaraldehyde activated alginate beads using response surface methodology: Characterization of immobilized enzyme, *Process Biochemistry*, 2011, 46, 1315-1322.

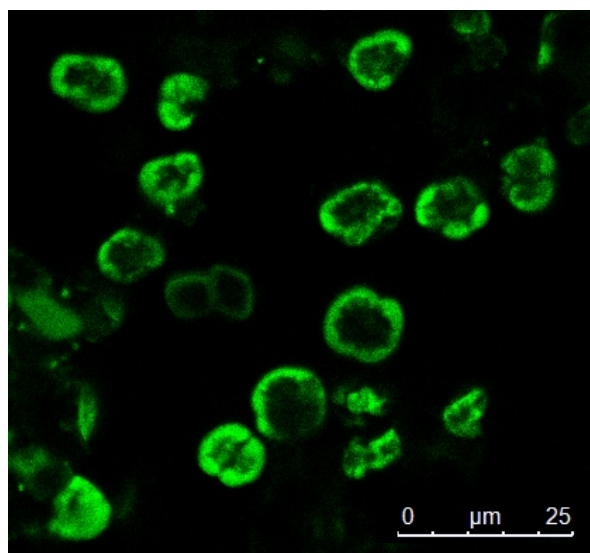

**Figure S1.** The CLSM image of the CAT-encapsulated (PDA-PEI)/titania hybrid microcapsules. (Notably, CAT was labelled with FITC.)

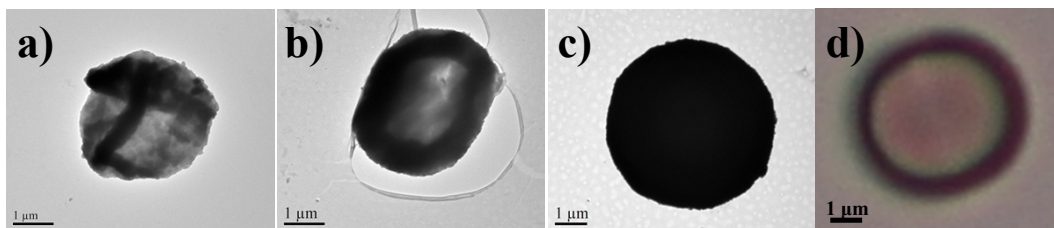

**Figure S2.** SEM images of the a) (PDA-PEI)/titania-1, b) (PDA-PEI)/titania-2 and c) (PDA-PEI)/titania-3 hybrid microcapsules; d) optical microscopy image of the (PDA-PEI)/titania-3 hybrid microcapsules.

To acquire the wall thickness of the (PDA-PEI)/titania-1, (PDA-PEI)/titania-2 and (PDA-PEI)/titania-3 hybrid microcapsules, the TEM and optical microscopy were conducted. As shown in **Figure S2a and S2b**, hollow structure could be clearly distinguished from both two TEM images, which indicated the average wall thickness of the (PDA-PEI)/titania-1 and (PDA-PEI)/titania-2 hybrid microcapsules were  $\sim 178$  and  $\sim 481$  nm, respectively. Unfortunately, the wall thickness of the (PDA-PEI)/titania-3 hybrid microcapsules cannot be acquired from **Figure S2c** mainly owing to the much larger wall thickness of the microcapsules. Therefore, optical microscopy image of the (PDA-PEI)/titania-3 hybrid microcapsules were obtained, from which an average wall thickness of  $\sim 710$  nm could be observed (**Figure S2d**). Notably, the average wall thickness for each microcapsule was calculated through counting at least 30 microcapsules.

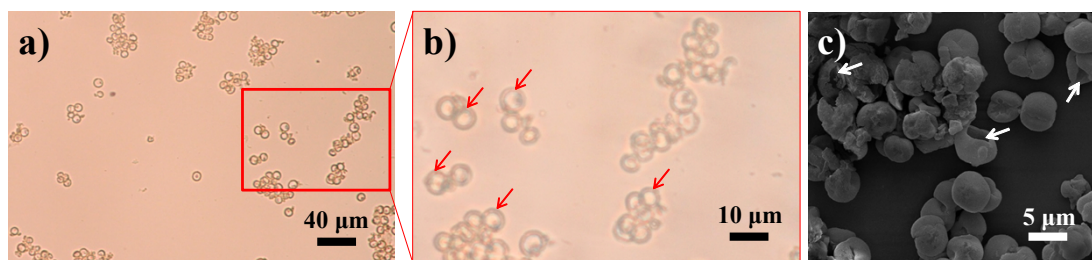

**Figure S3.** a) Optical image and b) high-resolution optical image of the (PDA-PEI)/titania-3 hybrid microcapsules synthesized from 10 mg mL<sup>-1</sup> of PEI solution, c) SEM image of the (PDA-PEI)/titania-3 hybrid microcapsules after manually ground.
